# Supplementary material
Source: PubMed Central journal article supplement (PMC3936330)

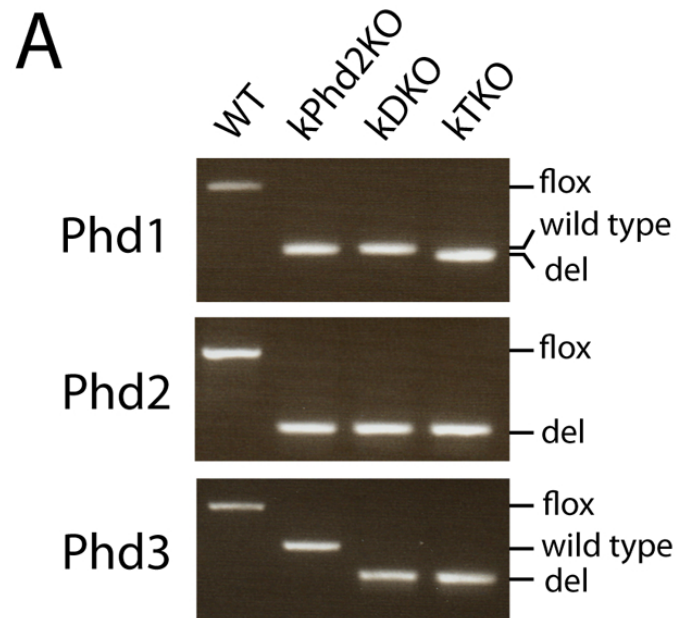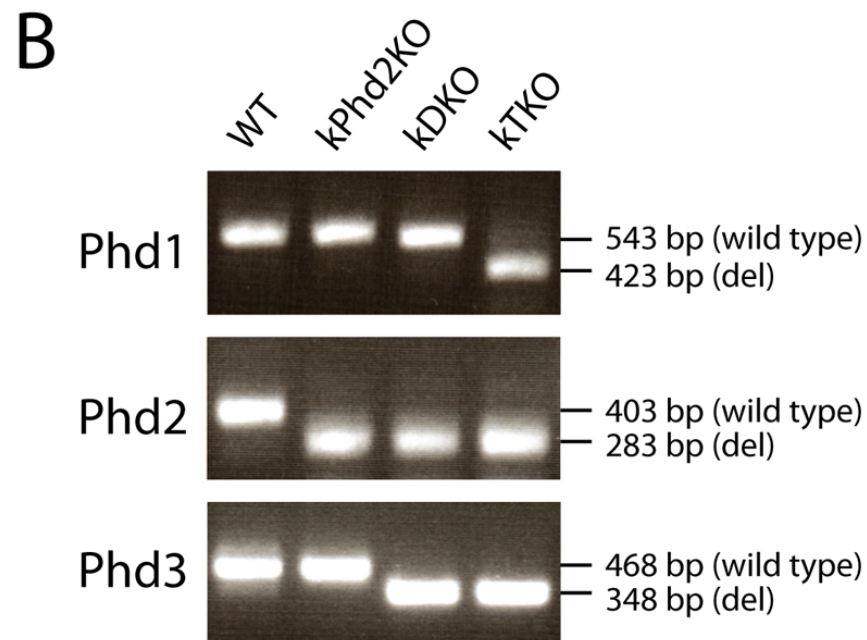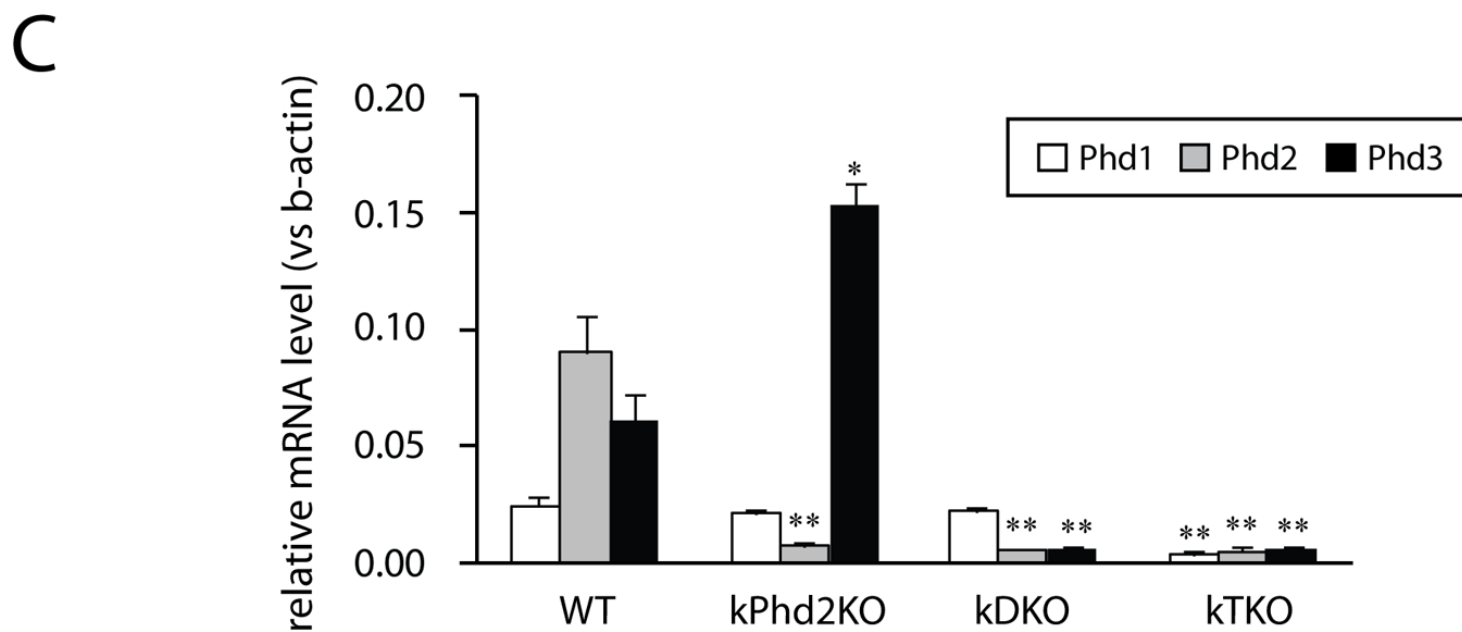

Figure S1

Supplement: mmc1.pdf [file mmc1.pdf]

# kPhd2KO

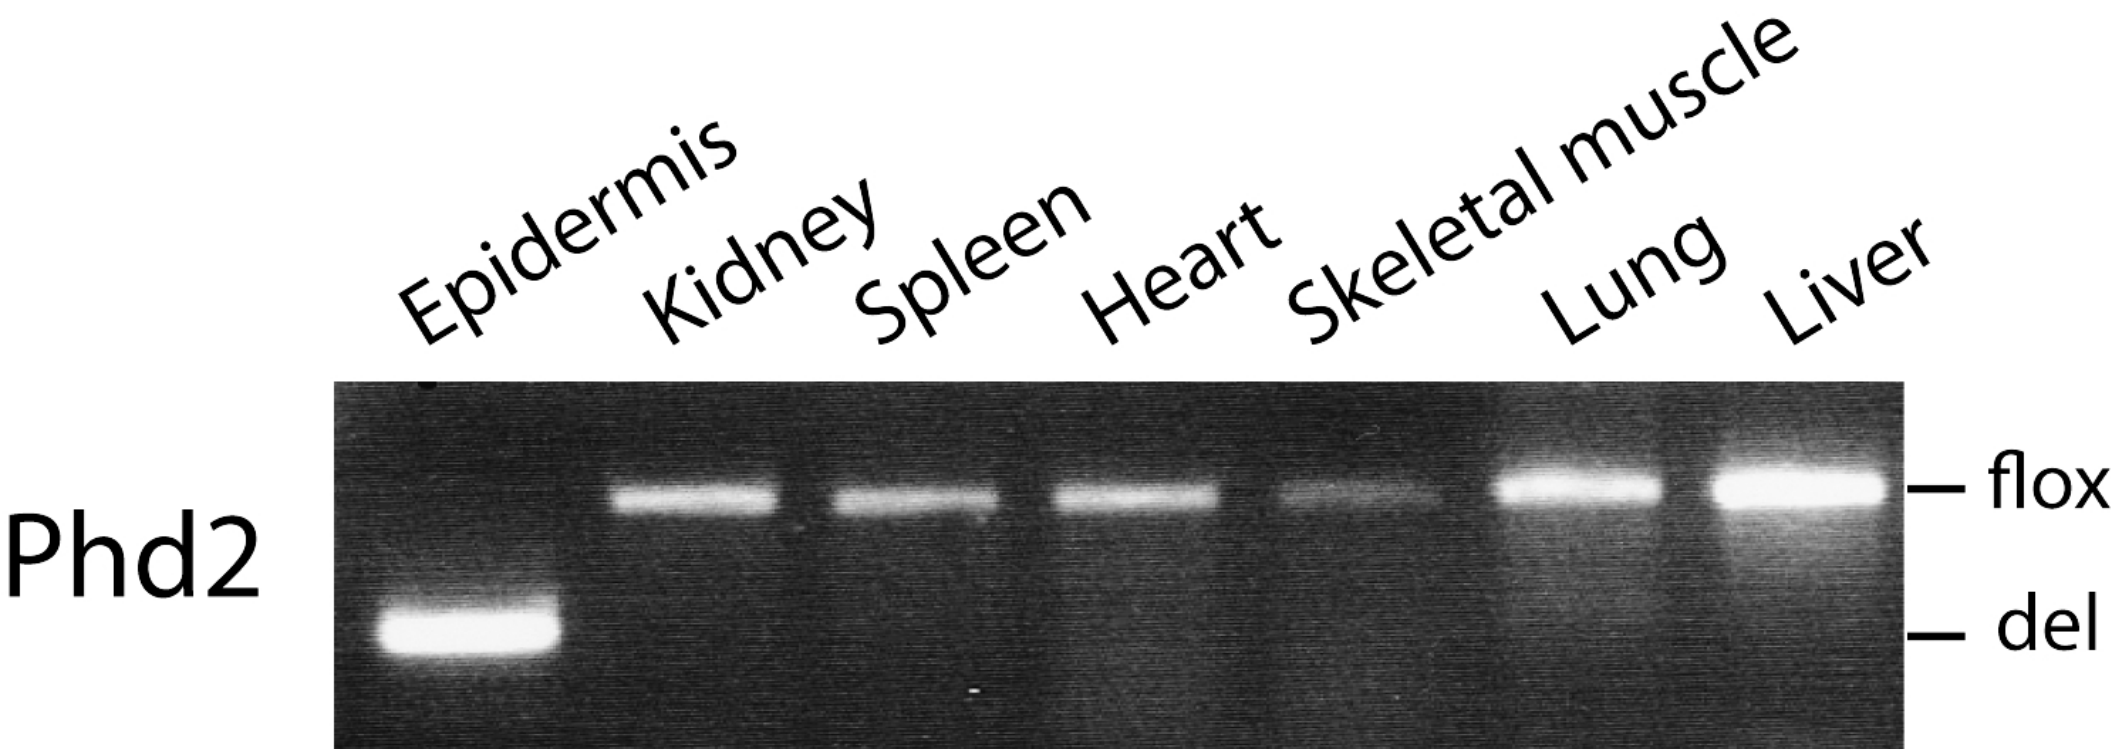

Figure S2

Supplement: mmc2.pdf [file mmc2.pdf]

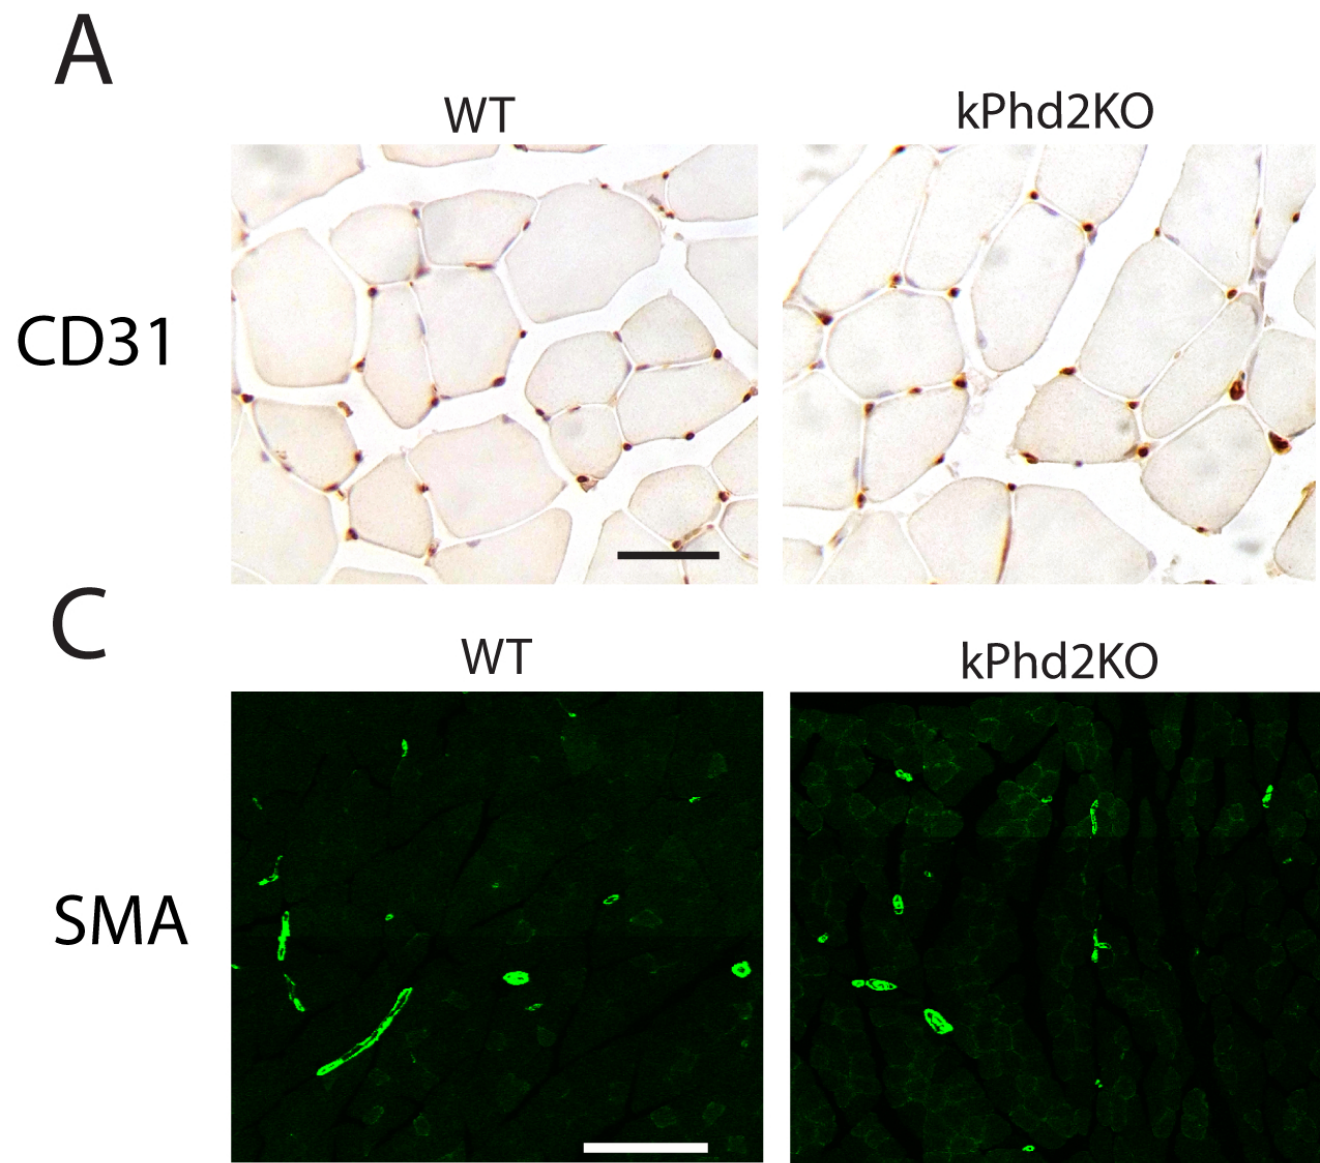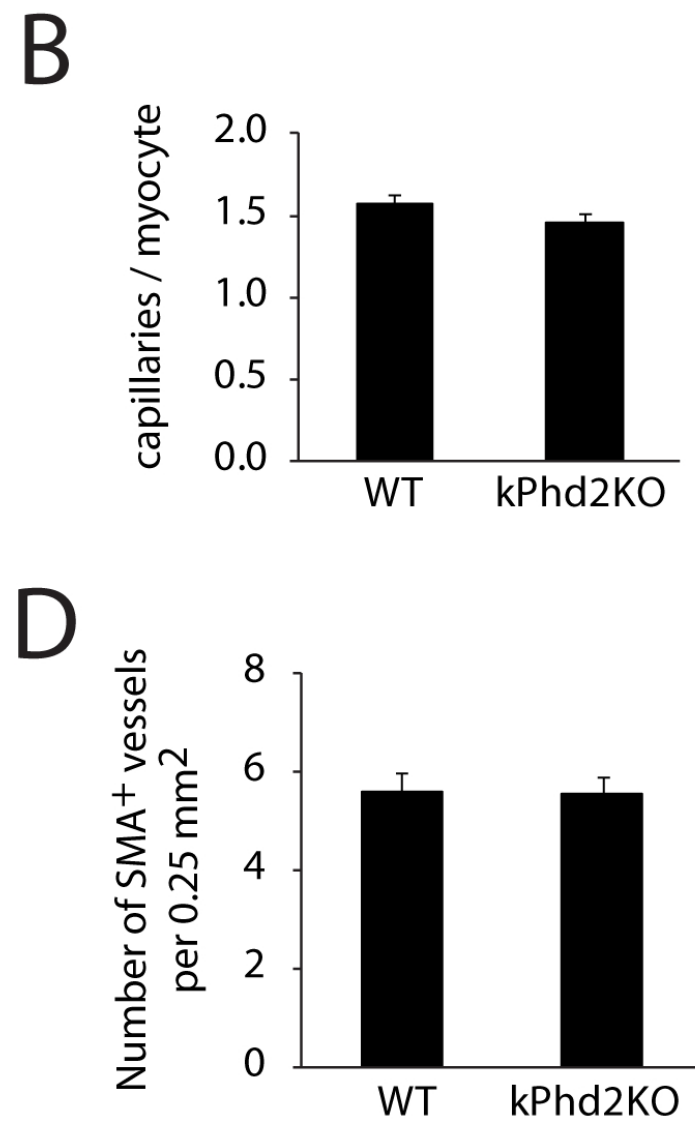

Figure S3

Supplement: mmc3.pdf [file mmc3.pdf]

A

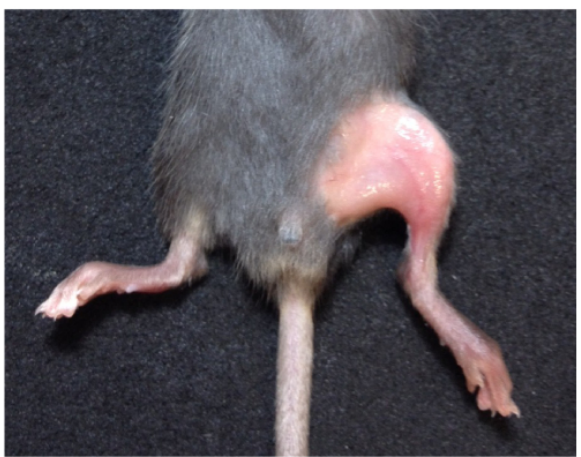

B

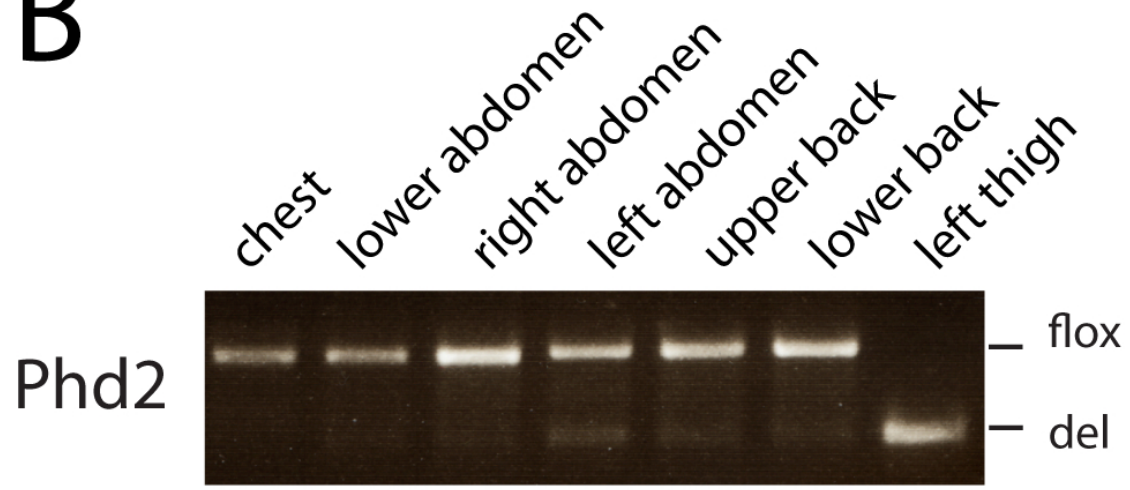

Figure S4

Supplement: mmc4.pdf [file mmc4.pdf]

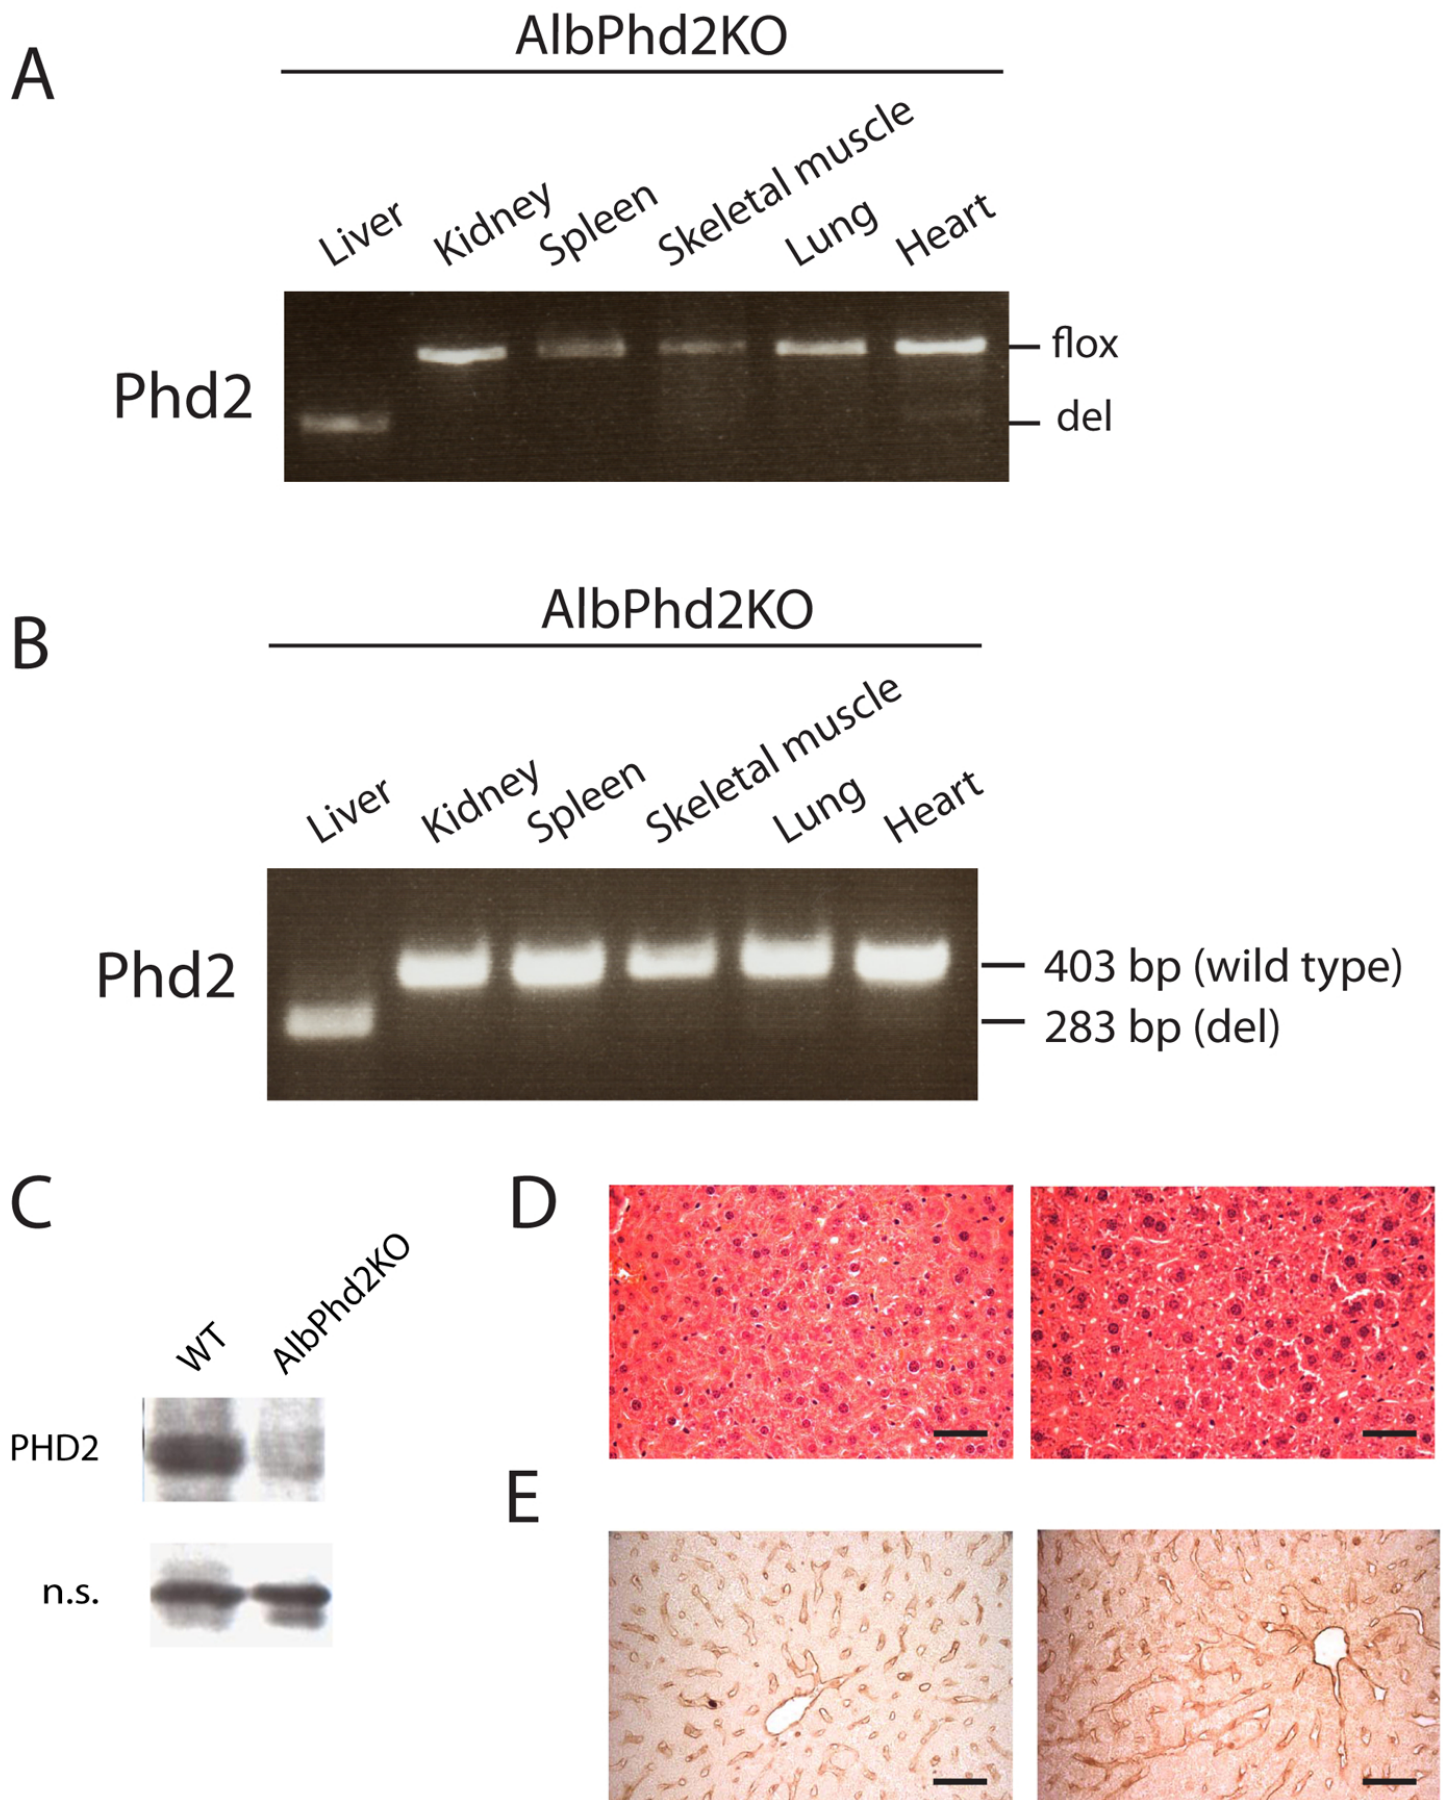

Figure S5

Supplement: mmc5.pdf [file mmc5.pdf]

Non-diabetic

WT

kPhd2KO

kDKO

kTKO

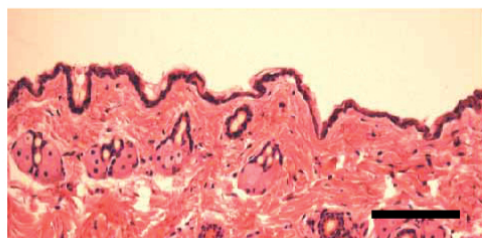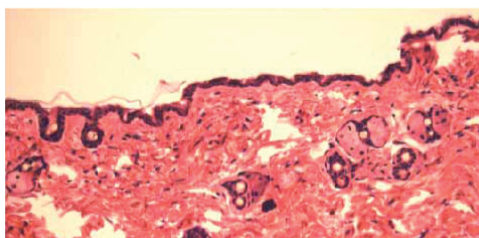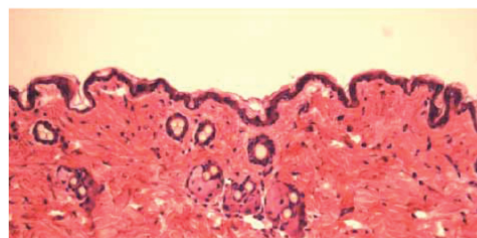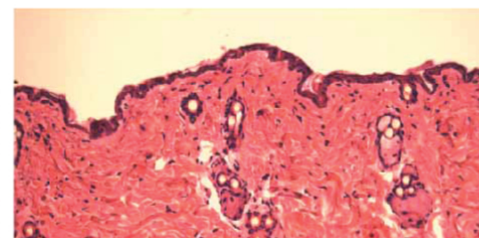

Diabetic (STZ)

WT

kPhd2KO

kDKO

kTKO

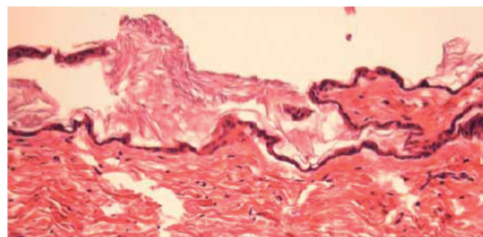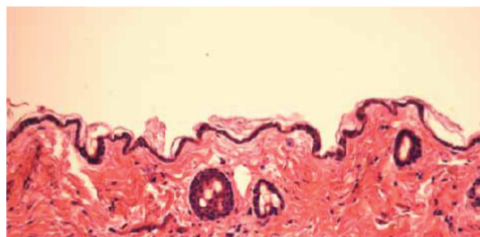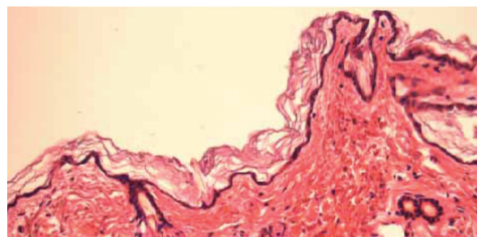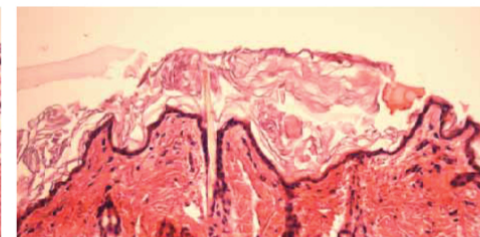

Figure S6

Supplement: mmc6.pdf [file mmc6.pdf]

**A**

Body weight

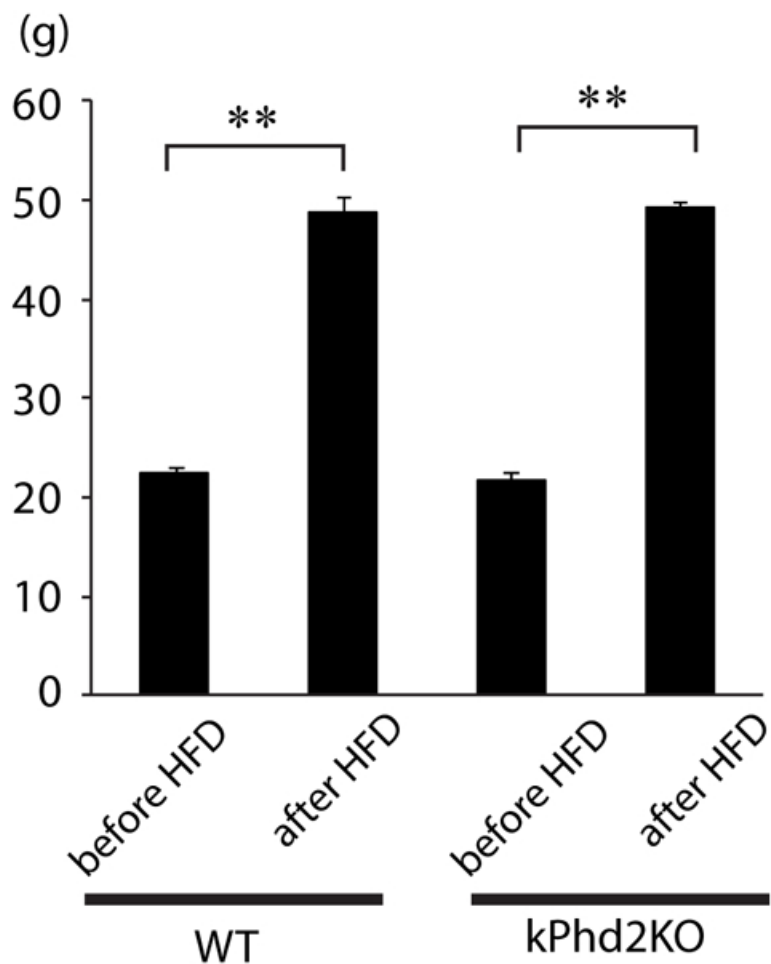**B**

Fasting blood glucose

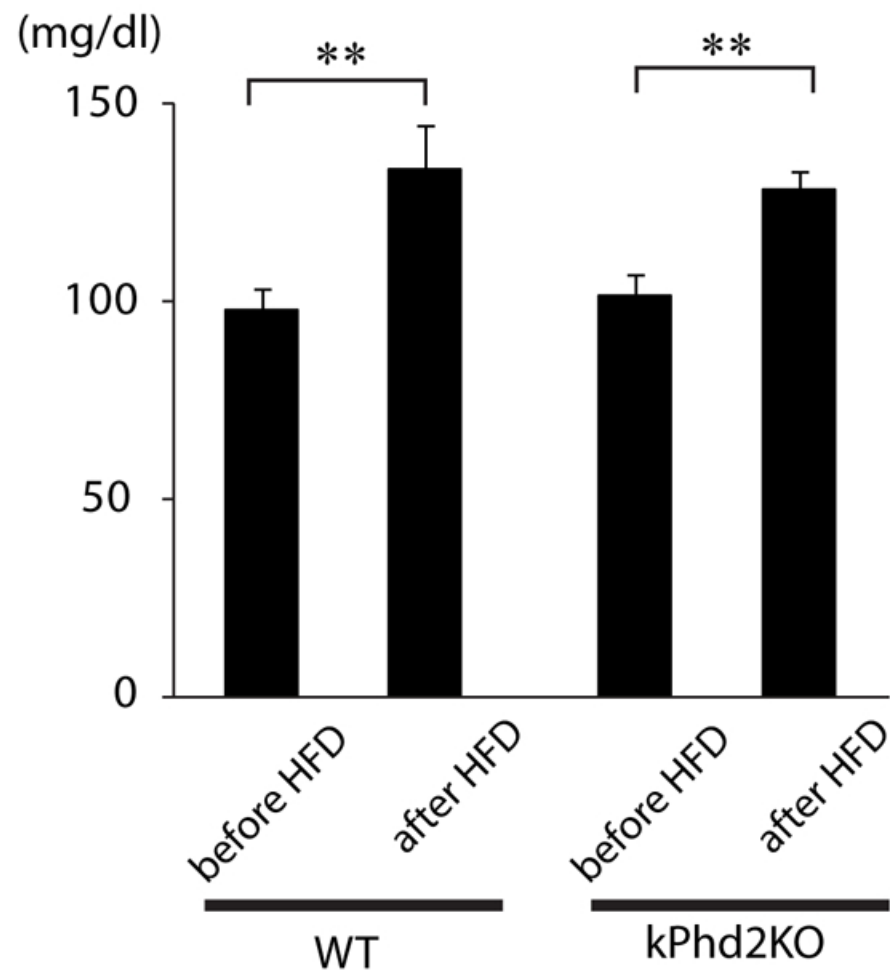

Figure S7

Supplement: mmc7.pdf [file mmc7.pdf]
